# Supplementary material
Source: Springer Nature journal article supplement (https://www.springermedizin.de/resource/supplementary/12995_2013_227_MOESM1_ESM.pdf/9622954)

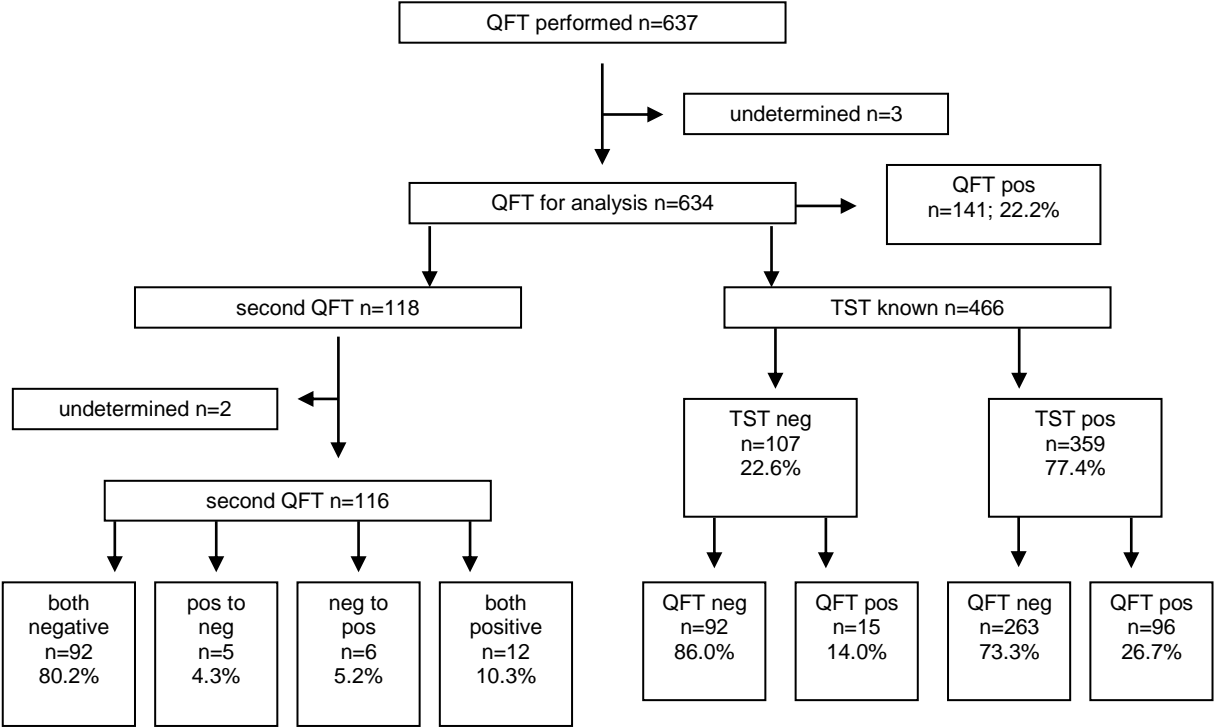

Supplement: MOESM1 [file 9622954]
